# Supplementary material for: Hepatocyte growth factor-like protein is required for prostate tumor growth in the TRAMP mouse model
Source: PubMed Central journal article supplement (PMC4170603; doi:10.18632/oncotarget.2139), 2014-06-26
Supplement: oncotarget-05-5547-s001.pdf [file oncotarget-05-5547-s001.pdf]

## Hepatocyte growth factor-Like protein is required for prostate tumor growth in the TRAMP mouse model

### Supplementary Material

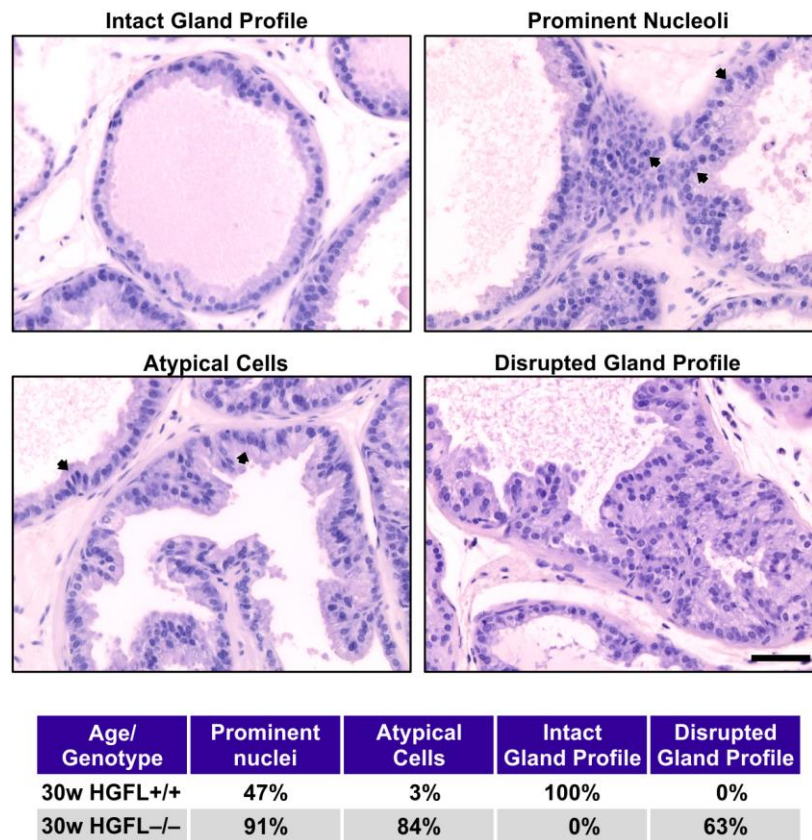

**Supplementary Figure S1. Histological characterization of prostates from HGFL+/+ and HGFL-/- mice.** 30-week old prostates from HGFL+/+ and HGFL-/- mice were evaluated for histologic abnormalities. Ten different fields from three different specimens from HGFL+/+ mice prostates and five different specimens from HGFL-/- prostates were analyzed. Representative images for each histological classification are shown. Scale bar is 50µm. Detailed pathological features observed per genotype are tabulated below. Prostates from HGFL+/+ and HGFL-/- mice were histologically classified by examination for the presence of prominent nuclei, atypical cells and disrupted glandular profiles as previously described (19).
